# Supplementary material
Source: publisher figshare collection journal article supplement (https://sage.figshare.com/ndownloader/files/15254201)
Supplement: Supplementary file 1 [file 15254201]

Appendix A. The variables of Standard cross-Cultural Sample used in the study

| No.                                         | variable                                                                 | case | score | explanation of the score                                                                                                                                           |
|---------------------------------------------|--------------------------------------------------------------------------|------|-------|--------------------------------------------------------------------------------------------------------------------------------------------------------------------|
| <b>Independent Variable: Honor culture.</b> |                                                                          |      |       |                                                                                                                                                                    |
| V625                                        | High value placed on males being aggressive, strong, and sexually potent | 105  | .     | Missing data                                                                                                                                                       |
|                                             |                                                                          | 26   | 1     | Marked emphasis                                                                                                                                                    |
|                                             |                                                                          | 33   | 2     | Moderate emphasis                                                                                                                                                  |
|                                             |                                                                          | 22   | 3     | Little or no emphasis                                                                                                                                              |
| V664                                        | Ideology of male toughness                                               | 78   | .     | Missing data                                                                                                                                                       |
|                                             |                                                                          | 21   | 1     | Absent                                                                                                                                                             |
|                                             |                                                                          | 81   | 2     | Present                                                                                                                                                            |
| V1765                                       | Emphasis on courage of boys in late childhood                            | 147  | .     | Missing data                                                                                                                                                       |
|                                             |                                                                          | 5    | 1     | courage is not emphasized; children are protected from harm which may be caused by scary situations, cold, and physical injuries                                   |
|                                             |                                                                          | 11   | 2     | courage is mildly emphasized; children are not protected from potentially dangerous situations; the expression of fear and pain is tolerated                       |
|                                             |                                                                          | 23   | 3     | courage is strongly emphasized; children are expected to tolerate pain and overcome fear in dangerous situations; the expression of fear and pain is not tolerated |
| V1774                                       | Revenge related norms                                                    | 106  | .     | Missing data                                                                                                                                                       |
|                                             |                                                                          | 15   | 1     | revenge taking is forbidden                                                                                                                                        |
|                                             |                                                                          | 17   | 2     | taking of revenge is neither forbidden nor prescribed                                                                                                              |
|                                             |                                                                          | 18   | 3     | taking of revenge is prescribed but compensation by payment equally valued                                                                                         |
|                                             |                                                                          | 16   | 4     | taking of revenge is prescribed                                                                                                                                    |
|                                             |                                                                          | 14   | 5     | taking of revenge is prescribed, retaliation is allowed only against the culprit                                                                                   |

**Mediating Variable: Social rewards for warriors.**

|      |                                                     |    |   |                                                                        |
|------|-----------------------------------------------------|----|---|------------------------------------------------------------------------|
| V903 | Prestige associated with being a soldier or warrior | 35 | . | Missing data                                                           |
|      |                                                     | 61 | 1 | A great deal; important for every male                                 |
|      |                                                     | 64 | 2 | some, not necessary to be a warrior to have influence in the community |

|       |                                                                                                                                                                |     |   |                                                                                                  |
|-------|----------------------------------------------------------------------------------------------------------------------------------------------------------------|-----|---|--------------------------------------------------------------------------------------------------|
|       |                                                                                                                                                                | 26  | 3 | No special consideration, respect, or distinctions for a man who fights                          |
| V905  | Rewards (Special gifts, praises, or ceremonies, not including ritual purification for a man who has killed an enemy in battle or otherwise shown skill in war) | 77  | . | Missing data                                                                                     |
|       |                                                                                                                                                                | 68  | 1 | Yes, usually or always                                                                           |
|       |                                                                                                                                                                | 16  | 2 | Sometimes                                                                                        |
|       |                                                                                                                                                                | 25  | 3 | Rarely or never                                                                                  |
| V913  | Trophies and honors (including captives for sacrifice)                                                                                                         | 18  | . | Missing data                                                                                     |
|       |                                                                                                                                                                | 49  | 1 | Present                                                                                          |
|       |                                                                                                                                                                | 119 | 2 | Absent or not mentioned                                                                          |
| V1773 | Prestige of warriors                                                                                                                                           | 111 | . | Missing data                                                                                     |
|       |                                                                                                                                                                | 12  | 1 | no warriors                                                                                      |
|       |                                                                                                                                                                | 9   | 2 | low prestige, warriors receive no special recognition                                            |
|       |                                                                                                                                                                | 13  | 3 | middle to high prestige; warriors have a good reputation, no data on other sources of reputation |
|       |                                                                                                                                                                | 12  | 4 | medium prestige of warriors, other sources of reputation are valued higher                       |
|       |                                                                                                                                                                | 15  | 5 | high prestige of warriors, other equally valued sources of reputation exist                      |
|       |                                                                                                                                                                | 14  | 6 | very high prestige, to gain prestige as a warrior is of special importance for every man         |

---

**Dependent Variables: intergroup conflict**

|      |                                            |     |   |                                       |
|------|--------------------------------------------|-----|---|---------------------------------------|
| V774 | External warfare                           | 102 | . | Missing data                          |
|      |                                            | 45  | 1 | Frequent, occurring at least yearly   |
|      |                                            | 13  | 2 | Common, at least every five years     |
|      |                                            | 6   | 3 | Occasional, at least every generation |
|      |                                            | 20  | 4 | Rare or never                         |
| V892 | Frequency of external war – attacking      | 29  | . | Missing data                          |
|      |                                            | 31  | 1 | Continual                             |
|      |                                            | 61  | 2 | Frequent                              |
|      |                                            | 65  | 3 | Infrequent                            |
| V893 | Frequency of external war - being attacked | 33  | . | Missing data                          |
|      |                                            | 26  | 1 | Continual                             |

|       |                                             |    |   |                                                        |
|-------|---------------------------------------------|----|---|--------------------------------------------------------|
|       |                                             | 67 | 2 | Frequent                                               |
|       |                                             | 60 | 3 | Infrequent                                             |
| V1778 | Frequency of interethnic violence/attacking | 97 | . | missing data                                           |
|       |                                             | 4  | 0 | no contact with other ethnic groups (original code 88) |
|       |                                             | 26 | 1 | rare or never                                          |
|       |                                             | 20 | 2 | occasional                                             |
|       |                                             | 24 | 3 | often                                                  |
|       |                                             | 15 | 4 | permanent                                              |

---

**Control variables.**

|       |                                |     |   |                                                     |
|-------|--------------------------------|-----|---|-----------------------------------------------------|
| V778  | Loyalty to the local community | 103 | . | Missing data                                        |
|       |                                | 30  | 1 | Especially high                                     |
|       |                                | 33  | 2 | High                                                |
|       |                                | 14  | 3 | Moderate                                            |
|       |                                | 6   | 4 | Low                                                 |
| V1771 | Loyalty within ethnic group    | 100 | . | missing data                                        |
|       |                                | 41  | 1 | low                                                 |
|       |                                | 18  | 2 | middle                                              |
|       |                                | 27  | 3 | high                                                |
| V157  | Political integration          | 11  | 1 | None                                                |
|       |                                | 72  | 2 | Autonomous local communities                        |
|       |                                | 46  | 3 | 1 level above community                             |
|       |                                | 28  | 4 | 2 levels above community                            |
|       |                                | 29  | 5 | 3 levels above community                            |
| V158  | Social stratification          | 65  | 1 | Egalitarian                                         |
|       |                                | 52  | 2 | Hereditary slavery                                  |
|       |                                | 19  | 3 | 2 social classes, no castes/slavery                 |
|       |                                | 20  | 4 | 2 social classes, castes/slavery                    |
|       |                                | 30  | 5 | 3 social classes or castes, with or without slavery |
| V859  | Resource Base                  |     | . | Missing data                                        |
|       |                                |     |   | [Low Resources] -> 1                                |
|       |                                | 9   | 1 | (2) Hunting and/or Marine Animals                   |
|       |                                | 9   | 2 | (1) Gathering                                       |

|      |                         |    |     |                                                                   |
|------|-------------------------|----|-----|-------------------------------------------------------------------|
|      |                         | 12 | 3   | (3) Fishing<br>[Unstable Resources] -> 2                          |
|      |                         | 5  | 4   | (5) Mounted Hunting                                               |
|      |                         | 33 | 5   | (7) Shifting Cultivation, with digging sticks or wooden hoes      |
|      |                         | 8  | 6   | (4) Anadromous Fishing                                            |
|      |                         | 18 | 7   | (9) Horticultural Gardens or Tree Fruits                          |
|      |                         | 23 | 8   | (11) Intensive Agriculture, with no plow<br>[High Resources] -> 3 |
|      |                         | 0  | 9   | (10) Advanced Horticulture, with metal hoes                       |
|      |                         | 19 | 10  | (8) Shifting Cultivation, with metal hoes                         |
|      |                         | 18 | 11  | (6) Pastoralism                                                   |
|      |                         | 32 | 12  | (12) Intensive Agriculture, with plow                             |
| V63  | Community size          | 1  | .   | Missing data                                                      |
|      |                         | 28 | 1   | < 50                                                              |
|      |                         | 28 | 2   | 50-99                                                             |
|      |                         | 45 | 3   | 100-199                                                           |
|      |                         | 32 | 4   | 200-399                                                           |
|      |                         | 29 | 5   | 400-999                                                           |
|      |                         | 15 | 6   | 1,000-4,999                                                       |
|      |                         | 5  | 7   | 5,000-49,999                                                      |
|      |                         | 3  | 8   | > 50,000                                                          |
| V64  | Population density      | 2  | .   | Missing data                                                      |
|      |                         | 36 | 1   | < 1 person per 5 sq. mile                                         |
|      |                         | 22 | 2   | 1 person per 1-5 sq. mile                                         |
|      |                         | 25 | 3   | 1-5 persons per sq. mile                                          |
|      |                         | 27 | 4   | 1-25 persons per sq. mile                                         |
|      |                         | 34 | 5   | 26-100 persons per sq. mile                                       |
|      |                         | 20 | 6   | 101-500 persons per sq. mile                                      |
|      |                         | 20 | 7   | over 500 persons per sq. mile                                     |
| V186 | Mean Annual temperature |    | -16 | Min                                                               |
|      |                         |    | 29  | Max                                                               |

---

Note. The information was based on the web page “Standard Cross-Cultural Sample: Codebook” (<http://eclectic.ss.uci.edu/~drwhite/courses/SCCCodes.htm>). The Score of resource base [V859] was recoded from 1–3 to 1 (low resources), 4–8 to 2 (unstable resources), and 9–12 to 3 (high resources), as Roes and Raymond (2003).



## Appendix. B.

### Confirmatory factor analysis of the variables made in this study

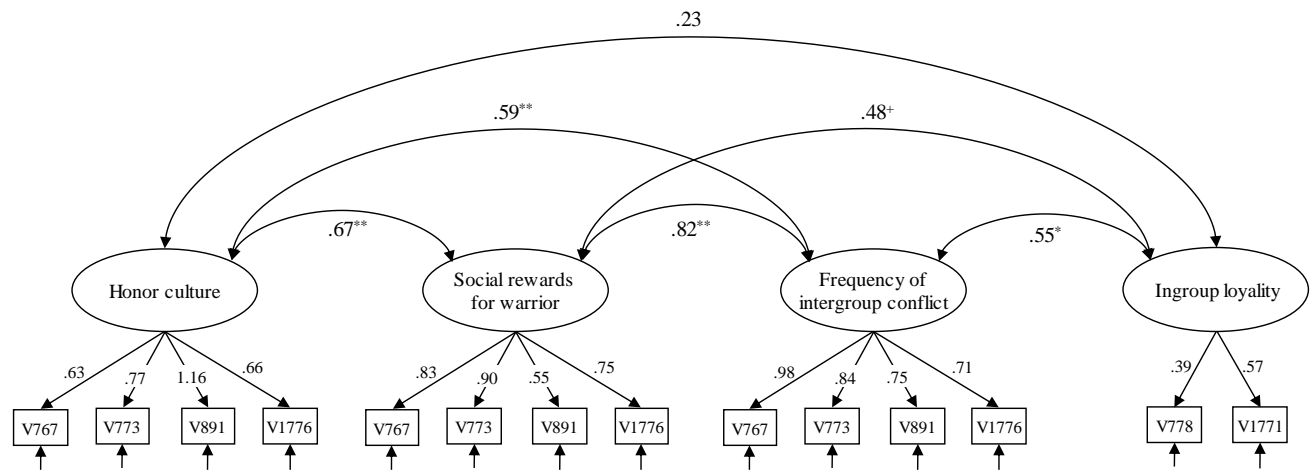

Note. \*\* $p < .01$ , \* $p < .05$ , + $p < .10$ . The score is standardized coefficients.  $N = 183$ . Fit index of this model is the following:  $\chi^2 = 94.128$ ,  $df = 71$ ,  $p = .022$ ; CFI = .975; TLI = .968; RMSEA = .042. All path coefficients from latent variables are significant. Because all observed variables are ordinal scale, weighted least squares parameter estimates were used. Full information maximum likelihood estimation was used for missing data in the analysis.

# Appendix. C.

Spearman rank correlation between the all variables

|                                  | Honor culture |        |        |        | Social Reward for warrior |        |        |        | Frequency of intergroup conflict |        |        |        | Control variables |       |        |        |        |      |        |      |
|----------------------------------|---------------|--------|--------|--------|---------------------------|--------|--------|--------|----------------------------------|--------|--------|--------|-------------------|-------|--------|--------|--------|------|--------|------|
|                                  | 1a            | 1b     | 1c     | 1d     | 2a                        | 2b     | 2c     | 2d     | 3a                               | 3b     | 3c     | 3d     | 4a                | 4b    | 4c     | 4d     | 4e     | 4f   | 5g     | 5h   |
| <b>Honor Culture</b>             |               |        |        |        |                           |        |        |        |                                  |        |        |        |                   |       |        |        |        |      |        |      |
| 1a [V625]                        | 1.00          |        |        |        |                           |        |        |        |                                  |        |        |        |                   |       |        |        |        |      |        |      |
| 1a [V625]                        |               |        |        |        |                           |        |        |        |                                  |        |        |        |                   |       |        |        |        |      |        |      |
| 1b [V664]                        |               | 1.00   |        |        |                           |        |        |        |                                  |        |        |        |                   |       |        |        |        |      |        |      |
| 1b [V664]                        |               |        |        |        |                           |        |        |        |                                  |        |        |        |                   |       |        |        |        |      |        |      |
| 1c [V1765]                       |               |        | 1.00   |        |                           |        |        |        |                                  |        |        |        |                   |       |        |        |        |      |        |      |
| 1c [V1765]                       |               |        |        |        |                           |        |        |        |                                  |        |        |        |                   |       |        |        |        |      |        |      |
| 1d [V1774]                       |               |        |        | 1.00   |                           |        |        |        |                                  |        |        |        |                   |       |        |        |        |      |        |      |
| 1d [V1774]                       |               |        |        |        |                           |        |        |        |                                  |        |        |        |                   |       |        |        |        |      |        |      |
| <b>Social Reward for warrior</b> |               |        |        |        |                           |        |        |        |                                  |        |        |        |                   |       |        |        |        |      |        |      |
| 2a [V903]                        | .27 *         | .29 ** | .53 ** | .37 ** | 1.00                      |        |        |        |                                  |        |        |        |                   |       |        |        |        |      |        |      |
| 2a [V903]                        |               |        |        |        |                           |        |        |        |                                  |        |        |        |                   |       |        |        |        |      |        |      |
| 2b [V905]                        | .30 **        | .21 *  | .50 ** | .32 ** | .59 **                    | 1.00   |        |        |                                  |        |        |        |                   |       |        |        |        |      |        |      |
| 2b [V905]                        |               |        |        |        |                           |        |        |        |                                  |        |        |        |                   |       |        |        |        |      |        |      |
| 2c [V913]                        | .16           | .15    | .04    | .19 *  | .31 **                    | .35 ** | 1.00   |        |                                  |        |        |        |                   |       |        |        |        |      |        |      |
| 2c [V913]                        |               |        |        |        |                           |        |        |        |                                  |        |        |        |                   |       |        |        |        |      |        |      |
| 2d [V1773]                       | .19 +         | .32 ** | .29 +  | .16    | .54 **                    | .52 ** | .29 ** | 1.00   |                                  |        |        |        |                   |       |        |        |        |      |        |      |
| 2d [V1773]                       |               |        |        |        |                           |        |        |        |                                  |        |        |        |                   |       |        |        |        |      |        |      |
| <b>Intergroup conflict</b>       |               |        |        |        |                           |        |        |        |                                  |        |        |        |                   |       |        |        |        |      |        |      |
| 3a [V774]                        | .35 **        | .45 ** | .59 ** | .09    | .44 **                    | .39 ** | .27 ** | .70 ** | 1.00                             |        |        |        |                   |       |        |        |        |      |        |      |
| 3a [V774]                        |               |        |        |        |                           |        |        |        |                                  |        |        |        |                   |       |        |        |        |      |        |      |
| 3b [V892]                        | .10           | .17 +  | .27    | .27 *  | .44 **                    | .50 ** | .25 ** | .42 ** | .63 **                           | 1.00   |        |        |                   |       |        |        |        |      |        |      |
| 3b [V892]                        |               |        |        |        |                           |        |        |        |                                  |        |        |        |                   |       |        |        |        |      |        |      |
| 3c [V893]                        | -.07          | .26 ** | .36 *  | .24 *  | .33 **                    | .43 ** | .26 *  | .26 *  | .55 **                           | .58 ** | 1.00   |        |                   |       |        |        |        |      |        |      |
| 3c [V893]                        |               |        |        |        |                           |        |        |        |                                  |        |        |        |                   |       |        |        |        |      |        |      |
| 3d [V1778]                       | -.06          | .35 ** | .38 *  | .18    | .39 **                    | .56 ** | .37 ** | .36 ** | .53 **                           | .56 ** | .37 ** | 1.00   |                   |       |        |        |        |      |        |      |
| 3d [V1778]                       |               |        |        |        |                           |        |        |        |                                  |        |        |        |                   |       |        |        |        |      |        |      |
| <b>Control variables</b>         |               |        |        |        |                           |        |        |        |                                  |        |        |        |                   |       |        |        |        |      |        |      |
| 4a [V778]                        | -.20 +        | .15    | .22    | -.09   | .06                       | .21 *  | .05    | .14    | .29 **                           | .14 +  | .14 +  | -.04   | 1.00              |       |        |        |        |      |        |      |
| 4a [V778]                        |               |        |        |        |                           |        |        |        |                                  |        |        |        |                   |       |        |        |        |      |        |      |
| 4b [V1771]                       | -.06          | -.01   | .14    | .19 +  | .18 *                     | .06    | .20 *  | .24 *  | .30 **                           | .18 *  | .07    | .28 ** | .16               | 1.00  |        |        |        |      |        |      |
| 4b [V1771]                       |               |        |        |        |                           |        |        |        |                                  |        |        |        |                   |       |        |        |        |      |        |      |
| 4c [V157]                        | .10           | .09    | .17    | .09    | .18 *                     | .08    | -.05   | .24 *  | .24 *                            | .25 ** | .15 +  | .04    | .07               | .21 + | 1.00   |        |        |      |        |      |
| 4c [V157]                        |               |        |        |        |                           |        |        |        |                                  |        |        |        |                   |       |        |        |        |      |        |      |
| 4d [V158]                        | -.31 **       | -.02   | .05    | -.13   | .06                       | .17 +  | -.06   | .22 +  | .07                              | .07    | .09    | .06    | .08               | -.02  | .44 ** | 1.00   |        |      |        |      |
| 4d [V158]                        |               |        |        |        |                           |        |        |        |                                  |        |        |        |                   |       |        |        |        |      |        |      |
| 4e [V859]                        | -.11          | .11    | .15    | -.02   | .13                       | .24 *  | .09    | .29 *  | .28 *                            | .22 ** | .16 *  | .27 *  | .14               | .19 + | .40 ** | .57 ** | 1.00   |      |        |      |
| 4e [V859]                        |               |        |        |        |                           |        |        |        |                                  |        |        |        |                   |       |        |        |        |      |        |      |
| 4f [V63]                         | .02           | -.16 + | -.04   | -.03   | .13                       | .26 ** | -.01   | -.03   | -.12                             | -.03   | .01    | .04    | -.03              | .00   | .03    | .32 ** | .20 ** | 1.00 |        |      |
| 4f [V63]                         |               |        |        |        |                           |        |        |        |                                  |        |        |        |                   |       |        |        |        |      |        |      |
| 4g [V64]                         | -.06          | .05    | .01    | -.01   | .18 *                     | .15    | .00    | .26 *  | .23 *                            | .32 ** | .16 +  | .11    | .19 +             | .14   | .51 ** | .59 ** | .46 ** | .03  | 1.00   |      |
| 4g [V64]                         |               |        |        |        |                           |        |        |        |                                  |        |        |        |                   |       |        |        |        |      |        |      |
| 4h [V186]                        | -.09          | -.02   | -.21   | -.17   | .09                       | .04    | -.10   | .23 *  | .13                              | .24 ** | .07    | .08    | -.06              | .11   | .52 ** | .55 ** | .45 ** | .03  | .70 ** | 1.00 |
| 4h [V186]                        |               |        |        |        |                           |        |        |        |                                  |        |        |        |                   |       |        |        |        |      |        |      |

Note. \*\*  $p < .01$ , \*  $p < .05$ , +  $p < .10$ . Parenthetical figures are  $N$  under  $r$  coefficient.
